# Supplementary material
Source: publisher figshare collection journal article supplement (https://gsapubs.figshare.com/ndownloader/files/23392721)
Supplement: Supplementary file 1 [file 23392721]

| Supplementary Table 1: Zircon U-Pb geochronology from Scottish inliers | | | | | |  |  |  |  |  |  |  |  |
| --- | --- | --- | --- | --- | --- | --- | --- | --- | --- | --- | --- | --- | --- |
| *Grp* | *Sample no. -* | *238U* | *232Th* | *Th* | *238U/206Pb* | | *207Pb/206Pb* | | *238U/206Pb* | | *207Pb/206Pb* | | *Disc* |
| *Id.* | *Spot no.* | *(ppm)* | *(ppm)* | */U* | *±1* | | *±1* | | *Date (Ma) ±1* | | *Date (Ma) ±1* | | *(%)* |
| d | 1805-3 | 418 | 110 | 0.26 | 3.94322 | 0.07774 | 0.13910 | 0.00380 | 1457 | 25 | 2216 | 47 | 34.3 |
| d | 1805-17 | 223 | 97 | 0.43 | 2.52334 | 0.04457 | 0.15640 | 0.00410 | 2152 | 32 | 2417 | 44 | 11.0 |
| d | 1805-13 | 657 | 40 | 0.06 | 2.48756 | 0.05260 | 0.16340 | 0.00410 | 2178 | 38 | 2491 | 42 | 12.6 |
| d | 1805-5 | 282 | 198 | 0.70 | 2.58398 | 0.03071 | 0.17110 | 0.00170 | 2109 | 21 | 2568 | 17 | 17.9 |
| p | 1805-18 | 258 | 281 | 1.09 | 2.11416 | 0.01408 | 0.17440 | 0.00140 | 2497 | 14 | 2600 | 13 | 4.0 |
| p | 1805-19 | 86 | 68 | 0.79 | 2.02143 | 0.01573 | 0.17670 | 0.00235 | 2591 | 17 | 2622 | 22 | 1.2 |
| p | 1805-7 | 401 | 261 | 0.65 | 2.22469 | 0.01361 | 0.17870 | 0.00125 | 2393 | 12 | 2641 | 12 | 9.4 |
| p | 1805-2 | 269 | 226 | 0.84 | 1.87970 | 0.01767 | 0.18190 | 0.00115 | 2750 | 21 | 2670 | 10 | -3.0 |
| p | 1805-12 | 304 | 607 | 2.00 | 1.99322 | 0.01073 | 0.18280 | 0.00160 | 2621 | 11 | 2678 | 14 | 2.1 |
| d | 1805-8 | 441 | 336 | 0.76 | 2.38322 | 0.01448 | 0.18490 | 0.00140 | 2259 | 12 | 2697 | 12 | 16.3 |
| i | 1805-16 | 176 | 316 | 1.79 | 1.96078 | 0.02115 | 0.18610 | 0.00215 | 2657 | 24 | 2708 | 19 | 1.9 |
| i | 1805-10 | 238 | 200 | 0.84 | 1.86150 | 0.01144 | 0.18780 | 0.00155 | 2772 | 14 | 2723 | 14 | -1.8 |
| i | 1805-1 | 514 | 114 | 0.22 | 2.01654 | 0.01606 | 0.18790 | 0.00125 | 2596 | 17 | 2724 | 11 | 4.7 |
| i | 1805-14 | 166 | 90 | 0.54 | 1.98138 | 0.01296 | 0.18880 | 0.00180 | 2634 | 14 | 2732 | 16 | 3.6 |
| i | 1805-11 | 396 | 149 | 0.38 | 1.89107 | 0.01109 | 0.18890 | 0.00135 | 2736 | 13 | 2733 | 12 | -0.1 |
| i | 1805-9 | 40 | 41 | 1.04 | 1.94175 | 0.02262 | 0.18970 | 0.00355 | 2678 | 25 | 2740 | 30 | 2.2 |
| i | 1805-15 | 234 | 106 | 0.45 | 1.99243 | 0.01131 | 0.19160 | 0.00130 | 2622 | 12 | 2756 | 11 | 4.9 |
| i | 1805-20 | 164 | 35 | 0.21 | 1.90803 | 0.01274 | 0.19170 | 0.00155 | 2717 | 15 | 2757 | 13 | 1.5 |
| x | 1805-4 | 162 | 192 | 1.19 | 1.82149 | 0.01659 | 0.20140 | 0.00170 | 2821 | 21 | 2838 | 14 | 0.6 |
| x | 1805-6 | 247 | 93 | 0.37 | 1.82349 | 0.01081 | 0.20710 | 0.00145 | 2819 | 14 | 2883 | 11 | 2.2 |
| p | 1807-1 | 76 | 94 | 1.24 | 1.92567 | 0.01743 | 0.18050 | 0.00210 | 2696 | 20 | 2657 | 19 | -1.5 |
| p | 1807-8 | 91 | 114 | 1.25 | 1.92234 | 0.01441 | 0.18050 | 0.00205 | 2700 | 16 | 2657 | 19 | -1.6 |
| p | 1807-18 | 175 | 179 | 1.02 | 2.08594 | 0.01936 | 0.18140 | 0.00155 | 2525 | 20 | 2666 | 14 | 5.3 |
| i | 1807-2 | 184 | 199 | 1.08 | 1.92086 | 0.01218 | 0.18230 | 0.00140 | 2702 | 14 | 2674 | 13 | -1.0 |
| i | 1807-17 | 96 | 121 | 1.26 | 1.88041 | 0.01291 | 0.18240 | 0.00185 | 2749 | 15 | 2675 | 17 | -2.8 |
| i | 1807-11 | 197 | 220 | 1.12 | 1.92715 | 0.01040 | 0.18360 | 0.00145 | 2695 | 12 | 2686 | 13 | -0.3 |
| i | 1807-10 | 171 | 112 | 0.66 | 1.96464 | 0.00926 | 0.18390 | 0.00160 | 2652 | 10 | 2688 | 14 | 1.3 |
| i | 1807-20 | 40 | 79 | 1.98 | 1.99601 | 0.02390 | 0.18390 | 0.00295 | 2618 | 25 | 2688 | 26 | 2.6 |
| i | 1807-3 | 181 | 266 | 1.47 | 2.05170 | 0.01137 | 0.18460 | 0.00155 | 2559 | 11 | 2695 | 14 | 5.0 |
| i | 1807-7 | 83 | 77 | 0.92 | 1.97316 | 0.01694 | 0.18510 | 0.00270 | 2643 | 19 | 2699 | 24 | 2.1 |
| i | 1807-16 | 82 | 111 | 1.36 | 1.92827 | 0.01320 | 0.18520 | 0.00230 | 2693 | 15 | 2700 | 20 | 0.3 |
| i | 1807-14 | 93 | 104 | 1.12 | 1.97433 | 0.01442 | 0.18590 | 0.00220 | 2642 | 16 | 2706 | 19 | 2.4 |
| i | 1807-5 | 19 | 35 | 1.83 | 1.85185 | 0.02743 | 0.18680 | 0.00450 | 2783 | 33 | 2714 | 39 | -2.6 |
| i | 1807-12 | 72 | 100 | 1.39 | 1.92308 | 0.01738 | 0.18720 | 0.00265 | 2699 | 20 | 2718 | 23 | 0.7 |
| i | 1807-9 | 106 | 92 | 0.87 | 1.78859 | 0.01472 | 0.18770 | 0.00170 | 2863 | 19 | 2722 | 15 | -5.2 |
| d | 1807-4 | 198 | 310 | 1.57 | 2.39808 | 0.06901 | 0.18840 | 0.00195 | 2247 | 53 | 2728 | 17 | 17.6 |
| i | 1807-19 | 123 | 153 | 1.25 | 1.80995 | 0.01163 | 0.19180 | 0.00160 | 2836 | 15 | 2758 | 14 | -2.8 |
| x | 1807-15 | 232 | 69 | 0.30 | 1.97863 | 0.00979 | 0.20310 | 0.00125 | 2637 | 11 | 2851 | 10 | 7.5 |
| d | 1807-13 | 132 | 155 | 1.17 | 2.15983 | 0.03499 | 0.20370 | 0.00230 | 2453 | 33 | 2856 | 18 | 14.1 |
| d | 1807-6 | 43 | 119 | 2.75 | 2.32558 | 0.05138 | 0.23100 | 0.00700 | 2306 | 42 | 3059 | 48 | 24.6 |
| p | 1809-7 | 104 | 43 | 0.41 | 2.07469 | 0.03013 | 0.18060 | 0.00215 | 2536 | 30 | 2658 | 20 | 4.6 |
| p | 1809-22 | 234 | 156 | 0.67 | 1.99283 | 0.01132 | 0.18100 | 0.00155 | 2622 | 13 | 2662 | 14 | 1.5 |
| i | 1809-29 | 327 | 216 | 0.66 | 1.93536 | 0.01405 | 0.18540 | 0.00115 | 2685 | 16 | 2702 | 10 | 0.6 |
| i | 1809-15 | 165 | 195 | 1.18 | 1.94704 | 0.01175 | 0.18650 | 0.00150 | 2672 | 13 | 2712 | 13 | 1.5 |
| i | 1809-2 | 358 | 127 | 0.35 | 1.99005 | 0.01584 | 0.18670 | 0.00100 | 2625 | 18 | 2713 | 9 | 3.3 |
| i | 1809-27 | 315 | 69 | 0.22 | 2.14500 | 0.01656 | 0.18680 | 0.00155 | 2467 | 16 | 2714 | 14 | 9.1 |
| i | 1809-30 | 179 | 231 | 1.29 | 1.87477 | 0.01160 | 0.18770 | 0.00165 | 2756 | 14 | 2722 | 14 | -1.2 |
| i | 1809-5 | 93 | 195 | 2.10 | 1.86951 | 0.01258 | 0.18890 | 0.00205 | 2762 | 15 | 2733 | 18 | -1.1 |
| i | 1809-9 | 41 | 73 | 1.80 | 1.89036 | 0.02501 | 0.19030 | 0.00305 | 2737 | 29 | 2745 | 26 | 0.3 |
| i | 1809-19 | 300 | 229 | 0.76 | 1.91388 | 0.01117 | 0.19040 | 0.00105 | 2710 | 13 | 2746 | 9 | 1.3 |
| i | 1809-11 | 110 | 70 | 0.63 | 1.87196 | 0.01314 | 0.19150 | 0.00175 | 2759 | 16 | 2755 | 15 | -0.1 |
| i | 1809-13 | 87 | 95 | 1.09 | 1.93498 | 0.01498 | 0.19220 | 0.00230 | 2686 | 17 | 2761 | 20 | 2.7 |
| p | 1809-18 | 145 | 69 | 0.48 | 1.84468 | 0.01004 | 0.19250 | 0.00170 | 2792 | 12 | 2764 | 14 | -1.0 |
| p | 1809-6 | 116 | 201 | 1.73 | 2.08768 | 0.03051 | 0.19340 | 0.00250 | 2523 | 30 | 2771 | 21 | 9.0 |
| p | 1809-24 | 389 | 38 | 0.10 | 1.91498 | 0.00990 | 0.19450 | 0.00145 | 2709 | 12 | 2781 | 12 | 2.6 |
| p | 1809-16 | 182 | 190 | 1.05 | 1.82782 | 0.00869 | 0.19520 | 0.00130 | 2813 | 11 | 2786 | 11 | -1.0 |
| p | 1809-23 | 122 | 172 | 1.42 | 1.85254 | 0.01338 | 0.19710 | 0.00225 | 2783 | 17 | 2802 | 19 | 0.7 |
| p | 1809-21 | 119 | 204 | 1.71 | 1.84706 | 0.01262 | 0.19850 | 0.00220 | 2789 | 15 | 2814 | 18 | 0.9 |
| p | 1809-12 | 80 | 42 | 0.53 | 1.86463 | 0.01460 | 0.19940 | 0.00245 | 2768 | 18 | 2821 | 20 | 1.9 |
| p | 1809-14 | 43 | 49 | 1.12 | 1.92678 | 0.03156 | 0.20350 | 0.00350 | 2695 | 36 | 2854 | 28 | 5.6 |
| p | 1809-20 | 113 | 79 | 0.69 | 1.86916 | 0.01537 | 0.20360 | 0.00245 | 2762 | 18 | 2855 | 19 | 3.2 |
| p | 1809-26 | 169 | 59 | 0.35 | 1.82515 | 0.01183 | 0.20590 | 0.00165 | 2816 | 14 | 2874 | 13 | 2.0 |
| p | 1809-25 | 81 | 13 | 0.16 | 1.85322 | 0.01649 | 0.20990 | 0.00255 | 2782 | 20 | 2905 | 20 | 4.2 |
| p | 1809-10 | 42 | 25 | 0.60 | 1.72712 | 0.01790 | 0.21060 | 0.00310 | 2945 | 25 | 2910 | 24 | -1.2 |
| p | 1809-17 | 105 | 56 | 0.53 | 1.79986 | 0.01312 | 0.21180 | 0.00215 | 2848 | 16 | 2919 | 16 | 2.4 |
| p | 1809-4 | 41 | 18 | 0.44 | 1.79856 | 0.02103 | 0.21390 | 0.00320 | 2850 | 27 | 2935 | 24 | 2.9 |
| p | 1809-8 | 95 | 10 | 0.11 | 1.69434 | 0.01249 | 0.24570 | 0.00160 | 2990 | 17 | 3157 | 10 | 5.3 |
| p | 1809-3 | 67 | 54 | 0.80 | 1.55618 | 0.01078 | 0.28630 | 0.00270 | 3199 | 17 | 3398 | 15 | 5.8 |
| x | 1809-1 | 84 | 51 | 0.61 | 1.39665 | 0.01170 | 0.31380 | 0.00330 | 3481 | 22 | 3540 | 16 | 1.7 |
| x | 1809-28 | 308 | 89 | 0.29 | 1.39063 | 0.00687 | 0.31410 | 0.00180 | 3493 | 14 | 3541 | 9 | 1.4 |
| p | 1810-6 | 379 | 312 | 0.82 | 2.15889 | 0.01398 | 0.17190 | 0.00145 | 2454 | 13 | 2576 | 14 | 4.8 |
| d | 1810-3 | 1140 | 269 | 0.24 | 2.37643 | 0.02315 | 0.17910 | 0.00100 | 2264 | 18 | 2645 | 9 | 14.4 |
| p | 1810-1 | 252 | 37 | 0.15 | 2.03666 | 0.02489 | 0.18380 | 0.00220 | 2575 | 26 | 2687 | 20 | 4.2 |
| p | 1810-4 | 1400 | 54 | 0.04 | 2.08594 | 0.01284 | 0.18680 | 0.00085 | 2525 | 13 | 2714 | 7 | 7.0 |
| d | 1810-2 | 1040 | 459 | 0.44 | 2.36128 | 0.02035 | 0.18970 | 0.00105 | 2276 | 16 | 2740 | 9 | 16.9 |
| d | 1810-5 | 144 | 80 | 0.55 | 2.19298 | 0.03366 | 0.19640 | 0.00250 | 2422 | 31 | 2797 | 21 | 13.4 |
| p | 18-13 - 15 | 315 | 50 | 0.16 | 5.98444 | 0.09670 | 0.07110 | 0.00225 | 996 | 15 | 960 | 63 | -3.7 |
| p | 18-13 - 9 | 260 | 105 | 0.41 | 5.65611 | 0.08958 | 0.07270 | 0.00220 | 1049 | 15 | 1006 | 60 | -4.4 |
| p | 18-13 - 10 | 385 | 158 | 0.41 | 6.09756 | 0.10039 | 0.07430 | 0.00215 | 979 | 15 | 1050 | 57 | 6.7 |
| d | 18-13 - 7 | 283 | 65 | 0.23 | 6.30517 | 0.11131 | 0.07510 | 0.00230 | 949 | 15 | 1071 | 60 | 11.4 |
| p | 18-13 - 12 | 186 | 50 | 0.27 | 4.91642 | 0.08339 | 0.07870 | 0.00265 | 1194 | 19 | 1165 | 65 | -2.5 |
| d | 18-13 - 19 | 328 | 91 | 0.28 | 6.04595 | 0.11149 | 0.07990 | 0.00225 | 987 | 17 | 1195 | 55 | 17.4 |
| d | 18-13 - 13 | 237 | 95 | 0.40 | 5.98444 | 0.09491 | 0.08150 | 0.00250 | 996 | 14 | 1234 | 59 | 19.2 |
| p | 18-13 - 2 | 132 | 74 | 0.56 | 4.91642 | 0.10152 | 0.08230 | 0.00285 | 1194 | 23 | 1253 | 66 | 4.7 |
| d | 18-13 - 4 | 273 | 102 | 0.37 | 5.38213 | 0.10863 | 0.08360 | 0.00300 | 1099 | 20 | 1283 | 68 | 14.4 |
| d | 18-13 - 11 | 269 | 145 | 0.54 | 5.12033 | 0.08914 | 0.08670 | 0.00255 | 1150 | 18 | 1354 | 56 | 15.1 |
| d | 18-13 - 17 | 267 | 118 | 0.44 | 5.44366 | 0.09483 | 0.09010 | 0.00295 | 1087 | 17 | 1428 | 61 | 23.8 |
| d | 18-13 - 3 | 246 | 117 | 0.48 | 4.86381 | 0.11828 | 0.09040 | 0.00275 | 1205 | 26 | 1434 | 57 | 15.9 |
| d | 18-13 - 18 | 316 | 204 | 0.65 | 4.61042 | 0.07971 | 0.09100 | 0.00255 | 1265 | 19 | 1447 | 52 | 12.5 |
| d | 18-13 - 16 | 437 | 139 | 0.32 | 4.39947 | 0.08129 | 0.09290 | 0.00235 | 1320 | 21 | 1486 | 47 | 11.1 |
| d | 18-13 - 14 | 33 | 31 | 0.94 | 4.31965 | 0.10263 | 0.09610 | 0.00500 | 1342 | 28 | 1550 | 95 | 13.4 |
| d | 18-13 - 8 | 340 | 135 | 0.40 | 4.04367 | 0.08012 | 0.10050 | 0.00280 | 1425 | 25 | 1633 | 51 | 12.8 |
| p | 18-13 - 6 | 157 | 179 | 1.14 | 3.53982 | 0.05639 | 0.10170 | 0.00280 | 1604 | 22 | 1655 | 50 | 3.1 |
| d | 18-13 - 1 | 211 | 98 | 0.46 | 4.65333 | 0.08337 | 0.10880 | 0.00365 | 1255 | 20 | 1779 | 60 | 29.5 |
| d | 18-13 - 5 | 171 | 76 | 0.44 | 5.44366 | 0.13631 | 0.13400 | 0.00600 | 1087 | 24 | 2151 | 76 | 49.5 |
| di | 18-19 - 10 | 804 | 101 | 0.13 | 4.09836 | 0.06467 | 0.10460 | 0.00255 | 1407 | 19 | 1707 | 44 | 17.6 |
| dy | 18-19 - 5 | 2640 | 52 | 0.02 | 3.74532 | 0.10521 | 0.10690 | 0.00250 | 1526 | 38 | 1747 | 42 | 12.7 |
| y | 18-19 - 6 | 3570 | 84 | 0.02 | 3.25627 | 0.05037 | 0.10820 | 0.00260 | 1726 | 23 | 1769 | 43 | 2.4 |
| y | 18-19 - 2 | 819 | 214 | 0.26 | 3.11526 | 0.05338 | 0.10970 | 0.00265 | 1795 | 27 | 1794 | 43 | 0.0 |
| dy | 18-19 - 4 | 234 | 26 | 0.11 | 2.71739 | 0.06277 | 0.11190 | 0.00315 | 2020 | 39 | 1831 | 50 | -10.4 |
| y | 18-19 - 9 | 132 | 79 | 0.59 | 3.18167 | 0.05568 | 0.11350 | 0.00320 | 1762 | 27 | 1856 | 50 | 5.1 |
| y | 18-19 - 3 | 310 | 97 | 0.31 | 2.96384 | 0.04831 | 0.12090 | 0.00305 | 1874 | 26 | 1970 | 44 | 4.8 |
| ds | 18-19 - 8 | 530 | 69 | 0.13 | 2.98240 | 0.05337 | 0.15200 | 0.00370 | 1864 | 28 | 2369 | 41 | 21.3 |
| s | 18-19 - 7 | 116 | 116 | 1.00 | 2.45218 | 0.04209 | 0.15930 | 0.00440 | 2205 | 32 | 2448 | 46 | 9.9 |
| s | 18-19 - 1 | 103 | 159 | 1.54 | 2.13812 | 0.03657 | 0.16230 | 0.00425 | 2473 | 34 | 2480 | 44 | 0.3 |
| d | 18-20 - 9 | 7220 | 649 | 0.09 | 5.68828 | 0.10192 | 0.08360 | 0.00200 | 1044 | 17 | 1283 | 46 | 18.6 |
| d | 18-20 - 21 | 2471 | 108 | 0.04 | 4.46628 | 0.08179 | 0.09600 | 0.00225 | 1302 | 21 | 1548 | 43 | 15.9 |
| i | 18-20 - 18 | 1059 | 105 | 0.10 | 3.90472 | 0.06175 | 0.09930 | 0.00235 | 1470 | 21 | 1611 | 43 | 8.8 |
| i | 18-20 - 10 | 1320 | 174 | 0.13 | 3.47464 | 0.05554 | 0.10180 | 0.00240 | 1631 | 23 | 1657 | 43 | 1.6 |
| i | 18-20 - 23 | 1250 | 143 | 0.11 | 3.62582 | 0.05784 | 0.10260 | 0.00240 | 1570 | 22 | 1672 | 43 | 6.1 |
| i | 18-20 - 13 | 1305 | 156 | 0.12 | 3.35570 | 0.05405 | 0.10380 | 0.00240 | 1681 | 23 | 1693 | 42 | 0.7 |
| i | 18-20 - 8 | 1195 | 165 | 0.14 | 3.27011 | 0.05133 | 0.10380 | 0.00245 | 1720 | 23 | 1693 | 43 | -1.6 |
| i | 18-20 - 14 | 1231 | 171 | 0.14 | 3.42818 | 0.05641 | 0.10400 | 0.00245 | 1650 | 24 | 1697 | 43 | 2.8 |
| i | 18-20 - 16 | 1292 | 118 | 0.09 | 3.40948 | 0.05464 | 0.10400 | 0.00245 | 1658 | 23 | 1697 | 43 | 2.3 |
| i | 18-20 - 22 | 1260 | 127 | 0.10 | 3.16857 | 0.04970 | 0.10420 | 0.00245 | 1768 | 24 | 1700 | 43 | -4.0 |
| i | 18-20 - 11 | 1127 | 107 | 0.09 | 3.41763 | 0.05490 | 0.10460 | 0.00250 | 1655 | 24 | 1707 | 43 | 3.1 |
| i | 18-20 - 2 | 1129 | 123 | 0.11 | 3.23939 | 0.04880 | 0.10540 | 0.00250 | 1734 | 22 | 1721 | 43 | -0.8 |
| i | 18-20 - 4 | 1768 | 298 | 0.17 | 3.58809 | 0.07081 | 0.10550 | 0.00250 | 1585 | 27 | 1723 | 43 | 8.0 |
| i | 18-20 - 1 | 761 | 135 | 0.18 | 3.18878 | 0.04830 | 0.10600 | 0.00255 | 1758 | 23 | 1732 | 43 | -1.5 |
| i | 18-20 - 19 | 964 | 123 | 0.13 | 3.26052 | 0.05156 | 0.10600 | 0.00250 | 1724 | 23 | 1732 | 43 | 0.4 |
| i | 18-20 - 20 | 1246 | 223 | 0.18 | 3.08452 | 0.04757 | 0.10600 | 0.00250 | 1810 | 24 | 1732 | 43 | -4.5 |
| i | 18-20 - 17 | 1605 | 166 | 0.10 | 3.27332 | 0.04929 | 0.10620 | 0.00245 | 1719 | 23 | 1735 | 42 | 1.0 |
| d | 18-20 - 6 | 736 | 84 | 0.11 | 3.91389 | 0.07123 | 0.10630 | 0.00265 | 1467 | 24 | 1737 | 45 | 15.6 |
| i | 18-20 - 3 | 1402 | 176 | 0.13 | 3.21543 | 0.04859 | 0.10650 | 0.00250 | 1746 | 23 | 1740 | 42 | -0.3 |
| i | 18-20 - 12 | 1310 | 235 | 0.18 | 3.20307 | 0.04976 | 0.10680 | 0.00250 | 1752 | 24 | 1746 | 42 | -0.3 |
| i | 18-20 - 7 | 937 | 171 | 0.18 | 3.21130 | 0.04847 | 0.10730 | 0.00255 | 1748 | 23 | 1754 | 43 | 0.4 |
| i | 18-20 - 5 | 1151 | 107 | 0.09 | 3.44590 | 0.05700 | 0.10800 | 0.00260 | 1643 | 24 | 1766 | 43 | 7.0 |
| d | 18-20 - 15 | 801 | 115 | 0.14 | 3.35458 | 0.05233 | 0.12750 | 0.00350 | 1682 | 23 | 2064 | 48 | 18.5 |
| i | 18-21 - 5 | 115 | 32 | 0.27 | 3.65230 | 0.06470 | 0.10240 | 0.00335 | 1560 | 24 | 1668 | 59 | 6.5 |
| i | 18-21 - 14 | 185 | 26 | 0.14 | 3.51494 | 0.05930 | 0.10380 | 0.00295 | 1614 | 24 | 1693 | 52 | 4.7 |
| i | 18-21 - 17 | 22 | 54 | 2.45 | 3.47222 | 0.07837 | 0.10500 | 0.00650 | 1632 | 32 | 1714 | 110 | 4.8 |
| i | 18-21 - 16 | 34 | 55 | 1.61 | 2.93255 | 0.06020 | 0.10550 | 0.00475 | 1891 | 33 | 1723 | 80 | -9.8 |
| i | 18-21 - 21 | 121 | 258 | 2.13 | 3.32557 | 0.05364 | 0.10710 | 0.00305 | 1695 | 24 | 1751 | 51 | 3.2 |
| i | 18-21 - 23 | 197 | 23 | 0.12 | 3.17965 | 0.05561 | 0.10710 | 0.00275 | 1763 | 27 | 1751 | 46 | -0.7 |
| i | 18-21 - 19 | 81 | 84 | 1.03 | 3.48675 | 0.05775 | 0.10730 | 0.00360 | 1626 | 24 | 1754 | 60 | 7.3 |
| i | 18-21 - 15 | 56 | 115 | 2.04 | 3.29272 | 0.06505 | 0.10920 | 0.00405 | 1710 | 30 | 1786 | 66 | 4.3 |
| d | 18-21 - 1 | 79 | 262 | 3.33 | 3.51741 | 0.06062 | 0.10960 | 0.00405 | 1613 | 24 | 1793 | 66 | 10.0 |
| i | 18-21 - 2 | 105 | 23 | 0.22 | 3.38181 | 0.05604 | 0.11000 | 0.00325 | 1670 | 24 | 1799 | 53 | 7.2 |
| i | 18-21 - 9 | 100 | 31 | 0.31 | 3.15159 | 0.05463 | 0.11000 | 0.00325 | 1777 | 27 | 1799 | 53 | 1.3 |
| i | 18-21 - 18 | 132 | 112 | 0.85 | 3.46260 | 0.05575 | 0.11090 | 0.00345 | 1636 | 23 | 1814 | 55 | 9.8 |
| i | 18-21 - 12 | 46 | 134 | 2.88 | 3.33556 | 0.06676 | 0.11260 | 0.00450 | 1690 | 29 | 1842 | 71 | 8.2 |
| i | 18-21 - 10 | 115 | 22 | 0.19 | 3.21854 | 0.05697 | 0.11700 | 0.00365 | 1744 | 26 | 1911 | 55 | 8.7 |
| d | 18-21 - 3 | 216 | 70 | 0.33 | 3.07787 | 0.05210 | 0.13220 | 0.00360 | 1814 | 27 | 2127 | 47 | 14.7 |
| d | 18-21 - 7 | 159 | 203 | 1.28 | 2.84819 | 0.04867 | 0.14380 | 0.00390 | 1940 | 28 | 2273 | 46 | 14.7 |
| p | 18-21 - 20 | 168 | 371 | 2.21 | 2.54582 | 0.04213 | 0.14990 | 0.00405 | 2136 | 30 | 2345 | 45 | 8.9 |
| p | 18-21 - 22 | 95 | 101 | 1.06 | 2.43191 | 0.04140 | 0.15960 | 0.00425 | 2220 | 31 | 2451 | 44 | 9.4 |
| d | 18-21 - 8 | 77 | 65 | 0.84 | 2.44559 | 0.02811 | 0.16820 | 0.00310 | 2210 | 21 | 2540 | 31 | 13.0 |
| x | 18-21 - 4 | 167 | 72 | 0.43 | 2.31160 | 0.02004 | 0.16860 | 0.00230 | 2317 | 16 | 2544 | 23 | 8.9 |
| x | 18-21 - 6 | 63 | 143 | 2.27 | 2.21092 | 0.02420 | 0.16900 | 0.00330 | 2405 | 21 | 2548 | 32 | 5.6 |
| d | 18-21 - 13 | 302 | 99 | 0.33 | 2.33973 | 0.01670 | 0.17340 | 0.00170 | 2294 | 14 | 2591 | 16 | 11.5 |
| d | 18-21 - 11 | 255 | 49 | 0.19 | 2.36855 | 0.02468 | 0.17530 | 0.00195 | 2270 | 19 | 2609 | 18 | 13.0 |
| z | MTZ1801 - 35 | 212 | 303 | 1.43 | 1.98177 | 0.04474 | 0.18675 | 0.00413 | 2634 | 48 | 2714 | 36 | 3.0 |
| z | MTZ1801 - 34 | 64 | 81 | 1.28 | 2.05761 | 0.05766 | 0.18737 | 0.00456 | 2553 | 58 | 2719 | 40 | 6.1 |
| z | MTZ1801 - 22 | 59 | 85 | 1.44 | 1.98413 | 0.04992 | 0.18749 | 0.00425 | 2631 | 53 | 2720 | 37 | 3.3 |
| z | MTZ1801 - 18 | 253 | 297 | 1.17 | 1.94250 | 0.04526 | 0.18761 | 0.00411 | 2677 | 50 | 2721 | 36 | 1.6 |
| z | MTZ1801 - 25 | 61 | 64 | 1.05 | 1.98728 | 0.05633 | 0.18830 | 0.00429 | 2628 | 60 | 2727 | 37 | 3.7 |
| z | MTZ1801 - 58 | 66 | 89 | 1.34 | 1.96618 | 0.05247 | 0.18832 | 0.00430 | 2651 | 57 | 2728 | 37 | 2.8 |
| z | MTZ1801 - 15 | 42 | 96 | 2.29 | 1.96155 | 0.06540 | 0.18955 | 0.00464 | 2656 | 71 | 2738 | 40 | 3.0 |
| z | MTZ1801 - 51 | 48 | 61 | 1.27 | 1.96580 | 0.05168 | 0.18965 | 0.00444 | 2651 | 56 | 2739 | 38 | 3.2 |
| z | MTZ1801 - 52 | 22 | 33 | 1.53 | 2.00521 | 0.06825 | 0.18980 | 0.00500 | 2608 | 71 | 2740 | 43 | 4.8 |
| z | MTZ1801 - 29 | 125 | 125 | 1.00 | 1.96271 | 0.04696 | 0.19016 | 0.00420 | 2654 | 51 | 2744 | 36 | 3.2 |
| D | MTZ1801 - 11 | 377 | 93 | 0.25 | 2.23214 | 0.10443 | 0.19030 | 0.00611 | 2386 | 90 | 2745 | 52 | 13.1 |
| D | MTZ1801 - 24 | 306 | 173 | 0.57 | 2.47464 | 0.08930 | 0.19110 | 0.00602 | 2188 | 65 | 2752 | 51 | 20.5 |
| z | MTZ1801 - 43 | 67 | 103 | 1.54 | 2.01248 | 0.05118 | 0.19184 | 0.00435 | 2600 | 53 | 2758 | 37 | 5.7 |
| D | MTZ1801 - 57 | 149 | 100 | 0.67 | 2.13265 | 0.07949 | 0.19210 | 0.00624 | 2479 | 74 | 2760 | 52 | 10.2 |
| z | MTZ1801 - 8 | 156 | 76 | 0.49 | 1.75531 | 0.04589 | 0.19306 | 0.00434 | 2907 | 60 | 2768 | 36 | -5.0 |
| z | MTZ1801 - 39 | 51 | 71 | 1.38 | 1.86150 | 0.04693 | 0.19408 | 0.00455 | 2772 | 56 | 2777 | 38 | 0.2 |
| z | MTZ1801 - 10 | 74 | 111 | 1.51 | 1.88822 | 0.04882 | 0.19428 | 0.00451 | 2740 | 56 | 2779 | 38 | 1.4 |
| z | MTZ1801 - 62 | 33 | 74 | 2.24 | 1.97472 | 0.05977 | 0.19491 | 0.00473 | 2641 | 64 | 2784 | 39 | 5.1 |
| z | MTZ1801 - 7 | 85 | 62 | 0.73 | 1.88289 | 0.04581 | 0.19519 | 0.00466 | 2746 | 53 | 2786 | 39 | 1.4 |
| z | MTZ1801 - 27 | 61 | 78 | 1.27 | 1.88751 | 0.05093 | 0.19525 | 0.00455 | 2741 | 59 | 2787 | 38 | 1.7 |
| z | MTZ1801 - 38 | 155 | 136 | 0.88 | 1.92012 | 0.05426 | 0.19561 | 0.00425 | 2703 | 61 | 2790 | 35 | 3.1 |
| z | MTZ1801 - 17 | 194 | 64 | 0.33 | 1.94742 | 0.05070 | 0.19584 | 0.00434 | 2672 | 56 | 2792 | 36 | 4.3 |
| z | MTZ1801 - 3 | 50 | 74 | 1.49 | 1.89251 | 0.05039 | 0.19620 | 0.00512 | 2735 | 58 | 2795 | 42 | 2.2 |
| z | MTZ1801 - 21 | 69 | 70 | 1.02 | 1.88786 | 0.04987 | 0.19652 | 0.00467 | 2740 | 58 | 2798 | 38 | 2.0 |
| z | MTZ1801 - 31 | 100 | 125 | 1.25 | 1.90114 | 0.05682 | 0.19676 | 0.00478 | 2725 | 65 | 2800 | 39 | 2.7 |
| z | MTZ1801 - 19 | 140 | 228 | 1.62 | 1.86498 | 0.04669 | 0.19683 | 0.00444 | 2768 | 55 | 2800 | 36 | 1.2 |
| z | MTZ1801 - 49 | 278 | 232 | 0.83 | 1.87477 | 0.04874 | 0.19687 | 0.00467 | 2756 | 57 | 2800 | 38 | 1.6 |
| z | MTZ1801 - 47 | 72 | 53 | 0.73 | 1.92308 | 0.06398 | 0.19712 | 0.00450 | 2699 | 71 | 2802 | 37 | 3.7 |
| z | MTZ1801 - 46 | 138 | 198 | 1.43 | 2.00000 | 0.05560 | 0.19723 | 0.00451 | 2614 | 58 | 2803 | 37 | 6.8 |
| i | MTZ1801 - 6 | 32 | 96 | 3.04 | 1.87371 | 0.05959 | 0.19740 | 0.00495 | 2757 | 70 | 2805 | 40 | 1.7 |
| i | MTZ1801 - 20 | 110 | 123 | 1.12 | 1.87161 | 0.04969 | 0.19755 | 0.00445 | 2760 | 58 | 2806 | 36 | 1.7 |
| i | MTZ1801 - 16 | 50 | 55 | 1.11 | 1.88430 | 0.05686 | 0.19762 | 0.00482 | 2744 | 66 | 2807 | 39 | 2.2 |
| i | MTZ1801 - 42 | 37 | 145 | 3.96 | 1.90658 | 0.05376 | 0.19770 | 0.00481 | 2718 | 61 | 2807 | 39 | 3.2 |
| i | MTZ1801 - 45 | 89 | 96 | 1.08 | 1.92715 | 0.05228 | 0.19779 | 0.00470 | 2695 | 58 | 2808 | 38 | 4.0 |
| i | MTZ1801 - 28 | 97 | 105 | 1.08 | 1.87336 | 0.04835 | 0.19802 | 0.00451 | 2757 | 57 | 2810 | 37 | 1.9 |
| i | MTZ1801 - 1 | 37 | 63 | 1.70 | 1.85598 | 0.04814 | 0.19832 | 0.00466 | 2778 | 57 | 2812 | 38 | 1.2 |
| i | MTZ1801 - 12 | 63 | 48 | 0.77 | 1.86185 | 0.04660 | 0.19836 | 0.00449 | 2771 | 55 | 2813 | 36 | 1.5 |
| i | MTZ1801 - 37 | 138 | 219 | 1.59 | 1.89502 | 0.04508 | 0.19844 | 0.00442 | 2732 | 52 | 2813 | 36 | 2.9 |
| i | MTZ1801 - 56 | 126 | 144 | 1.14 | 1.91644 | 0.04678 | 0.19850 | 0.00466 | 2707 | 53 | 2814 | 38 | 3.8 |
| i | MTZ1801 - 40 | 146 | 124 | 0.84 | 1.84638 | 0.04477 | 0.19872 | 0.00441 | 2790 | 54 | 2816 | 36 | 0.9 |
| i | MTZ1801 - 48 | 87 | 92 | 1.06 | 2.00521 | 0.05016 | 0.19901 | 0.00482 | 2608 | 53 | 2818 | 39 | 7.4 |
| i | MTZ1801 - 36 | 138 | 123 | 0.89 | 1.89358 | 0.06154 | 0.19911 | 0.00468 | 2733 | 71 | 2819 | 38 | 3.0 |
| i | MTZ1801 - 32 | 58 | 31 | 0.54 | 1.95503 | 0.05018 | 0.19926 | 0.00480 | 2663 | 55 | 2820 | 39 | 5.6 |
| i | MTZ1801 - 4 | 47 | 52 | 1.11 | 1.87899 | 0.05241 | 0.19936 | 0.00468 | 2751 | 61 | 2821 | 38 | 2.5 |
| i | MTZ1801 - 13 | 91 | 46 | 0.50 | 1.88608 | 0.05088 | 0.19945 | 0.00488 | 2742 | 59 | 2822 | 39 | 2.8 |
| i | MTZ1801 - 55 | 57 | 85 | 1.49 | 1.95084 | 0.05310 | 0.19959 | 0.00498 | 2668 | 58 | 2823 | 40 | 5.5 |
| i | MTZ1801 - 54 | 41 | 96 | 2.37 | 1.96812 | 0.05292 | 0.19980 | 0.00520 | 2649 | 57 | 2825 | 42 | 6.2 |
| i | MTZ1801 - 50 | 27 | 65 | 2.36 | 1.93274 | 0.05360 | 0.20000 | 0.00620 | 2688 | 60 | 2826 | 50 | 4.9 |
| i | MTZ1801 - 59 | 129 | 251 | 1.94 | 1.87864 | 0.04922 | 0.20019 | 0.00434 | 2751 | 57 | 2828 | 35 | 2.7 |
| i | MTZ1801 - 61 | 95 | 111 | 1.17 | 1.92012 | 0.05868 | 0.20019 | 0.00434 | 2703 | 66 | 2828 | 35 | 4.4 |
| i | MTZ1801 - 53 | 65 | 80 | 1.23 | 1.91168 | 0.05249 | 0.20082 | 0.00459 | 2712 | 59 | 2833 | 37 | 4.3 |
| i | MTZ1801 - 33 | 88 | 97 | 1.10 | 1.87021 | 0.04580 | 0.20088 | 0.00476 | 2761 | 54 | 2833 | 38 | 2.5 |
| i | MTZ1801 - 30 | 97 | 103 | 1.06 | 1.87477 | 0.04452 | 0.20157 | 0.00460 | 2756 | 52 | 2839 | 37 | 2.9 |
| i | MTZ1801 - 44 | 182 | 148 | 0.81 | 2.05170 | 0.05871 | 0.20157 | 0.00467 | 2559 | 59 | 2839 | 37 | 9.8 |
| i | MTZ1801 - 60 | 70 | 137 | 1.96 | 1.93162 | 0.04871 | 0.20340 | 0.00607 | 2689 | 54 | 2854 | 48 | 5.8 |
| i | MTZ1801 - 14 | 17 | 39 | 2.29 | 1.75439 | 0.07510 | 0.20680 | 0.00724 | 2908 | 97 | 2881 | 56 | -0.9 |
| i | MTZ1801 - 2 | 110 | 133 | 1.21 | 1.81127 | 0.05952 | 0.20710 | 0.00694 | 2834 | 73 | 2883 | 53 | 1.7 |
| x | MTZ1801 - 9 | 180 | 73 | 0.40 | 1.82782 | 0.05126 | 0.20960 | 0.00539 | 2813 | 62 | 2902 | 41 | 3.1 |
| x | MTZ1801 - 26 | 63 | 52 | 0.82 | 1.78476 | 0.04653 | 0.21420 | 0.00548 | 2868 | 59 | 2938 | 41 | 2.4 |
| x | MTZ1801 - 41 | 91 | 81 | 0.89 | 1.81719 | 0.06804 | 0.23430 | 0.01359 | 2826 | 83 | 3082 | 90 | 8.3 |
| Errors include both internal and external uncertainty propagated in quadrature. Grp. Id refers to spot interpretation as follows: I = magmatic, X = inherited, S = detrital, D = discordant, P = interpreted to have lost radiogenic-Pb (e.g. faded zoning / high alpha dose) or mixture. Z = other specific growth process discussed in the supplementary text. When a D is appended to another group identifier it signifies the analysis is outside discordance thresholds but defines a regression with the specified group. | | | | | | | | | | | | | |
